# Supplementary material for: Susceptibility to tobacco use and associated factors among youth in five central and eastern European countries
Source: Springer Nature journal article supplement (doi:10.1186/s12889-022-12493-6), 2022-01-11
Supplement: MOESM1 [file 20021086]

## **Susceptibility to tobacco use and associated factors among youth in five central and eastern European countries**

**Kinga Polanska\*, Malgorzata Znyk, Dorota Kaleta**

Department of Hygiene and Epidemiology, Medical University of Lodz, Poland

\*Corresponding author:

Kinga Polanska, MPH, Ph.D.

Department of Hygiene and Epidemiology,

Medical University of Lodz,

7/9 Zeligowskiego Str., 90-647 Lodz, Poland

kinga.polanska@umed.lodz.pl; Tel.: +48-426-781-688

Email addresses:

Kinga Polanska: [kinga.polanska@umed.lodz.pl](mailto:kinga.polanska@umed.lodz.pl)

Malgorzata Znyk: [malgorzata.znyk@umed.lodz.pl](mailto:malgorzata.znyk@umed.lodz.pl)

Dorota Kaleta: [dorota.kaleta@umed.lodz.pl](mailto:dorota.kaleta@umed.lodz.pl)



|                                                                                                                      |             |            |             |            |             |            |             |            |             |            |
|----------------------------------------------------------------------------------------------------------------------|-------------|------------|-------------|------------|-------------|------------|-------------|------------|-------------|------------|
| No                                                                                                                   | 129 (6.5)   | 44 (34.1)  | 124 (6.2)   | 45 (36.3)  | 94 (5.3)    | 35 (37.2)  | 160 (12.3)  | 49 (30.6)  | 572 (15.5)  | 136 (23.8) |
| Yes                                                                                                                  | 1866 (93.5) | 446 (23.9) | 1868 (93.8) | 404 (21.6) | 1667 (94.7) | 358 (21.5) | 1144 (87.7) | 248 (21.7) | 3120 (84.5) | 445 (14.3) |
| Missing**                                                                                                            | 2 (0.1)     |            | 6 (0.3)     |            | 4 (0.2)     |            | 1 (0.1)     |            | 26 (0.7)    |            |
| Seen people using tobacco when watched TV, videos or movies                                                          |             |            |             |            |             |            |             |            |             |            |
| Yes                                                                                                                  | 1423 (71.3) | 371 (26.1) | 1018 (51.5) | 250 (24.6) | 1323 (75.0) | 323 (24.4) | 724 (56.2)  | 185 (25.6) | 1986 (54.0) | 335 (16.9) |
| No                                                                                                                   | 572 (28.7)  | 118 (20.6) | 960 (48.5)  | 197 (20.5) | 440 (25.0)  | 71 (16.1)  | 565 (43.8)  | 109 (19.3) | 1694 (46.0) | 239 (14.1) |
| Missing**                                                                                                            | 2 (0.1)     |            | 20 (1.0)    |            | 2 (0.1)     |            | 16 (1.2)    |            | 38 (1.0)    |            |
| Exposure to advertisements or promotions at points of sale                                                           |             |            |             |            |             |            |             |            |             |            |
| Yes                                                                                                                  | 878 (44.0)  | 240 (27.3) | 603 (30.4)  | 169 (28.0) | 543 (30.8)  | 156 (28.7) | 226 (17.4)  | 58 (25.7)  | 923 (25.0)  | 171 (18.5) |
| No                                                                                                                   | 1117 (56.0) | 248 (22.2) | 1383 (69.6) | 281 (20.3) | 1218 (69.2) | 237 (19.5) | 1076 (82.6) | 239 (22.2) | 2763 (75.0) | 403 (14.6) |
| Missing**                                                                                                            | 2 (0.1)     |            | 12 (0.6)    |            | 4 (0.2)     |            | 3 (0.2)     |            | 32 (0.9)    |            |
| Exposure to antismoking media messages                                                                               |             |            |             |            |             |            |             |            |             |            |
| Yes                                                                                                                  | 949 (47.7)  | 229 (24.1) | 932 (47.3)  | 191 (20.5) | 787 (44.8)  | 184 (23.4) | 602 (46.7)  | 127 (21.1) | 2213 (60.4) | 338 (15.3) |
| No                                                                                                                   | 1042 (52.3) | 259 (24.9) | 1040 (52.7) | 250 (24.0) | 969 (55.2)  | 206 (21.3) | 687 (53.5)  | 162 (23.6) | 1452 (39.6) | 227 (15.6) |
| Missing**                                                                                                            | 6 (0.3)     |            | 26 (1.3)    |            | 9 (0.5)     |            | 16 (1.2)    |            | 53 (1.4)    |            |
| School discussion about health effects of smoking                                                                    |             |            |             |            |             |            |             |            |             |            |
| Yes                                                                                                                  | 872 (43.8)  | 189 (21.7) | 879 (44.1)  | 177 (20.1) | 741 (42.1)  | 140 (18.9) | 823 (63.1)  | 149 (18.1) | 1550 (42.0) | 239 (15.4) |
| No                                                                                                                   | 1119 (56.2) | 297 (26.5) | 1112 (55.9) | 272 (24.5) | 1018 (57.9) | 253 (24.9) | 481 (36.9)  | 147 (30.6) | 2137 (58.0) | 327 (15.3) |
| Missing**                                                                                                            | 6 (0.3)     |            | 7 (0.4)     |            | 6 (0.3)     |            | 1 (0.1)     |            | 31 (0.8)    |            |
| School discussion about the reasons why people use tobacco                                                           |             |            |             |            |             |            |             |            |             |            |
| Yes                                                                                                                  | 592 (29.7)  | 142 (24.0) | 648 (32.6)  | 144 (22.2) | 443 (25.3)  | 103 (23.3) | 506 (38.8)  | 108 (21.3) | 1361 (36.9) | 243 (17.9) |
| No                                                                                                                   | 1398 (70.3) | 346 (24.8) | 1340 (67.4) | 304 (22.7) | 1310 (74.7) | 289 (22.1) | 798 (61.2)  | 189 (23.7) | 2328 (63.1) | 331 (14.2) |
| Missing**                                                                                                            | 7 (0.4)     |            | 10 (0.5)    |            | 12 (0.7)    |            | 1 (0.1)     |            | 29 (0.8)    |            |
| Antismoking education provided by family                                                                             |             |            |             |            |             |            |             |            |             |            |
| Yes                                                                                                                  | 1268 (63.8) | 298 (23.5) | N/A         | N/A        | 1210 (69.5) | 238 (19.7) | 765 (59.7)  | 167 (21.8) | 2532 (69.4) | 353 (13.9) |
| No                                                                                                                   | 719 (36.2)  | 190 (26.4) |             |            | 530 (30.5)  | 150 (28.3) | 517 (40.3)  | 123 (23.8) | 1116 (30.6) | 195 (17.5) |
| Missing**                                                                                                            | 10 (0.5)    |            |             |            | 25 (1.4)    |            | 23 (1.8)    |            | 70 (1.9)    |            |
| Difficulty of quitting smoking by smoker                                                                             |             |            |             |            |             |            |             |            |             |            |
| Not difficult                                                                                                        | 153 (7.7)   | 43 (28.1)  | 328 (16.5)  | 80 (24.4)  | 281 (16.1)  | 67 (23.8)  | 502 (38.5)  | 117 (23.3) | 922 (24.9)  | 188 (20.4) |
| Difficult                                                                                                            | 1843 (92.3) | 447 (24.3) | 1658 (83.5) | 364 (21.9) | 1468 (83.9) | 323 (22.0) | 801 (61.5)  | 179 (22.3) | 2783 (75.1) | 394 (14.2) |
| Missing**                                                                                                            | 1 (0.1)     |            | 12 (0.6)    |            | 16 (0.9)    |            | 2 (0.2)     |            | 13 (0.3)    |            |
| Smoking helps people feel more comfortable or less comfortable at celebrations parties or in other social gatherings |             |            |             |            |             |            |             |            |             |            |
| More comfortable                                                                                                     | 723 (36.4)  | 202 (27.9) | 862 (44.0)  | 220 (25.5) | 849 (48.9)  | 220 (25.9) | 348 (27.0)  | 110 (31.6) | 792 (21.8)  | 179 (22.6) |
| Less comfortable or no differences                                                                                   | 1264 (63.6) | 286 (22.6) | 1096 (56.0) | 220 (20.1) | 886 (51.1)  | 165 (18.6) | 941 (73.0)  | 179 (19.0) | 2840 (78.2) | 376 (13.2) |
| Missing**                                                                                                            | 10 (0.5)    |            | 40 (2.0)    |            | 30 (1.7)    |            | 16 (1.2)    |            | 86 (2.3)    |            |
| People who smoke have more or less friends                                                                           |             |            |             |            |             |            |             |            |             |            |
| More friends                                                                                                         | N/A         | N/A        | 330 (16.7)  | 75 (22.7)  | N/A         | N/A        | 425 (32.7)  | 95 (22.4)  | 576 (15.8)  | 122 (21.2) |
| Less friends                                                                                                         |             |            | 432 (21.9)  | 68 (15.7)  |             |            | 267 (20.6)  | 42 (15.7)  | 1067 (29.3) | 104 (9.8)  |
| No differences                                                                                                       |             |            | 1211 (61.4) | 297 (24.5) |             |            | 606 (46.8)  | 157 (25.9) | 2002 (54.9) | 338 (16.9) |
| Missing**                                                                                                            |             |            | 25 (1.3)    |            |             |            | 7 (0.5)     |            | 73 (2.0)    |            |
| Smoking makes young people look more or less attractive                                                              |             |            |             |            |             |            |             |            |             |            |
| More attractive                                                                                                      | N/A         | N/A        | 63 (3.4)    | 54 (33.1)  | N/A         | N/A        | 75 (5.8)    | 20 (26.7)  | 317 (8.7)   | 82 (25.9)  |
| Less attractive                                                                                                      |             |            | 1228 (65.9) | 225 (18.3) |             |            | 874 (67.6)  | 170 (19.5) | 1727 (47.2) | 169 (9.8)  |
| No differences                                                                                                       |             |            | 572 (30.7)  | 154 (26.9) |             |            | 344 (26.6)  | 105 (30.5) | 1618 (44.2) | 311 (19.2) |
| Missing**                                                                                                            |             |            | 35 (1.8)    |            |             |            | 12 (0.9)    |            | 56 (1.5)    |            |

\*percentages calculated for observed values; \*\*percentages of total number of subjects

SHS – secondhand smoke

N/A – data is not available



|                                                                                                          |                  |      |                  |       |                  |       |                  |       |                  |       |  |
|----------------------------------------------------------------------------------------------------------|------------------|------|------------------|-------|------------------|-------|------------------|-------|------------------|-------|--|
| No (ref.)                                                                                                |                  |      |                  |       |                  |       |                  |       |                  |       |  |
| Yes                                                                                                      | 1.32 (1.07-1.62) | 0.01 | 1.53 (1.22-1.90) | <0.01 | 1.67 (1.32-2.11) | <0.01 | 1.21 (0.87-1.68) | 0.26  | 1.33 (1.09-1.62) | <0.01 |  |
| Exposure to antismoking media messages                                                                   |                  |      |                  |       |                  |       |                  |       |                  |       |  |
| Yes (ref.)                                                                                               |                  |      |                  |       |                  |       |                  |       |                  |       |  |
| No                                                                                                       | 1.04 (0.85-1.28) | 0.71 | 1.23 (0.99-1.52) | 0.06  | 0.88 (0.71-1.11) | 0.29  | 1.15 (0.89-1.50) | 0.29  | 1.03 (0.86-1.23) | 0.77  |  |
| School discussion about health effects of smoking                                                        |                  |      |                  |       |                  |       |                  |       |                  |       |  |
| Yes (ref.)                                                                                               |                  |      |                  |       |                  |       |                  |       |                  |       |  |
| No                                                                                                       | 1.31 (1.06-1.61) | 0.01 | 1.28 (1.04-1.59) | 0.02  | 1.42 (1.13-1.79) | <0.01 | 1.99 (1.53-2.59) | <0.01 | 0.99 (0.83-1.19) | 0.92  |  |
| School discussion about the reasons why people use tobacco                                               |                  |      |                  |       |                  |       |                  |       |                  |       |  |
| Yes (ref.)                                                                                               |                  |      |                  |       |                  |       |                  |       |                  |       |  |
| No                                                                                                       | 1.04 (0.83-1.30) | 0.72 | 1.03 (0.82-1.29) | 0.82  | 0.93 (0.72-1.21) | 0.60  | 1.14 (0.87-1.50) | 0.33  | 0.76 (0.64-0.91) | <0.01 |  |
| Antismoking education provided by family                                                                 |                  |      |                  |       |                  |       |                  |       |                  |       |  |
| Yes (ref.)                                                                                               |                  |      |                  |       |                  |       |                  |       |                  |       |  |
| No                                                                                                       | 1.17 (0.95-1.44) | 0.15 | N/A              |       | 1.61 (1.27-2.04) | <0.01 | 1.12 (0.86-1.46) | 0.41  | 1.31 (1.08-1.58) | <0.01 |  |
| Difficulty of quitting smoking by smoker                                                                 |                  |      |                  |       |                  |       |                  |       |                  |       |  |
| Difficult (ref.)                                                                                         |                  |      |                  |       |                  |       |                  |       |                  |       |  |
| Not difficult                                                                                            | 1.22 (0.84-1.76) | 0.29 | 1.15 (0.87-1.51) | 0.33  | 1.11 (0.82-1.50) | 0.50  | 1.06 (0.81-1.38) | 0.69  | 1.55 (1.28-1.88) | <0.01 |  |
| Smoking helps people feel more or less comfortable at celebrations parties or in other social gatherings |                  |      |                  |       |                  |       |                  |       |                  |       |  |
| Less comfortable or no differences (ref.)                                                                |                  |      |                  |       |                  |       |                  |       |                  |       |  |
| More comfortable                                                                                         | 1.33 (1.08-1.63) | 0.01 | 1.36 (1.10-1.69) | <0.01 | 1.53 (1.22-1.92) | <0.01 | 1.97 (1.49-2.60) | <0.01 | 1.91 (1.57-2.33) | <0.01 |  |
| People who smoke have more or less friends                                                               |                  |      |                  |       |                  |       |                  |       |                  |       |  |
| No differences (ref.)                                                                                    |                  |      |                  |       |                  |       |                  |       |                  |       |  |
| More fiends                                                                                              | N/A              |      | 0.91 (0.68-1.21) | 0.50  | N/A              |       | 0.82 (0.61-1.10) | 0.19  | 1.32 (1.05-1.67) | 0.02  |  |
| Less friends                                                                                             |                  |      | 0.57 (0.43-0.77) | <0.01 |                  |       | 0.53 (0.37-0.78) | <0.01 | 0.53 (0.42-0.67) | <0.01 |  |
| Smoking makes young people look more or less attractive                                                  |                  |      |                  |       |                  |       |                  |       |                  |       |  |
| No differences (ref.)                                                                                    |                  |      |                  |       |                  |       |                  |       |                  |       |  |
| More attractive                                                                                          | N/A              |      | 1.34 (0.92-1.96) | 0.12  | N/A              |       | 0.83 (0.47-1.45) | 0.51  | 1.47 (1.11-1.94) | <0.01 |  |
| Less attractive                                                                                          |                  |      | 0.61 (0.48-0.77) | <0.01 |                  |       | 0.55 (0.41-0.73) | <0.01 | 0.46 (0.37-0.56) | <0.01 |  |

SHS – secondhand smoke

N/A – data is not available

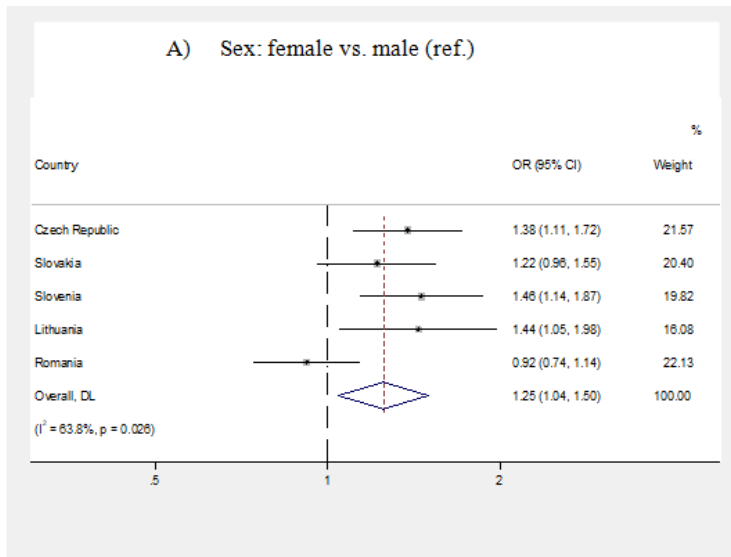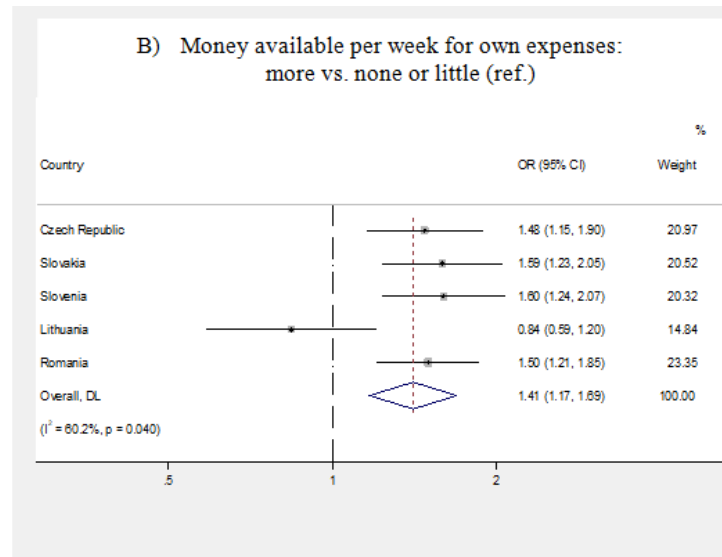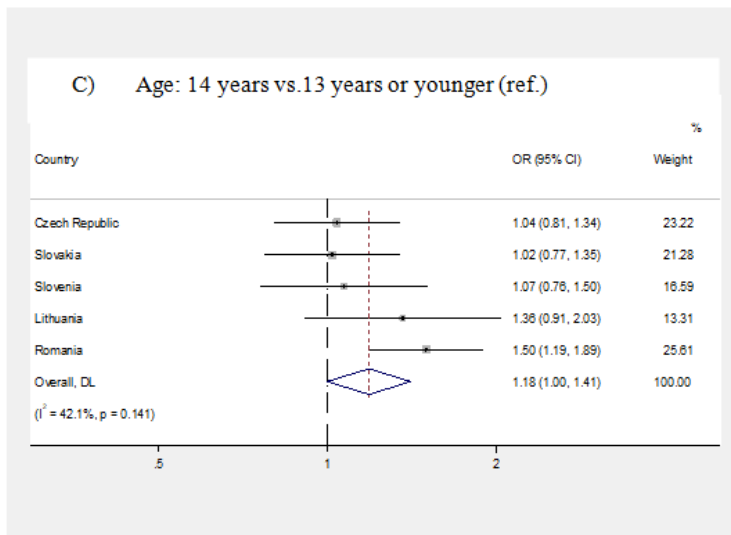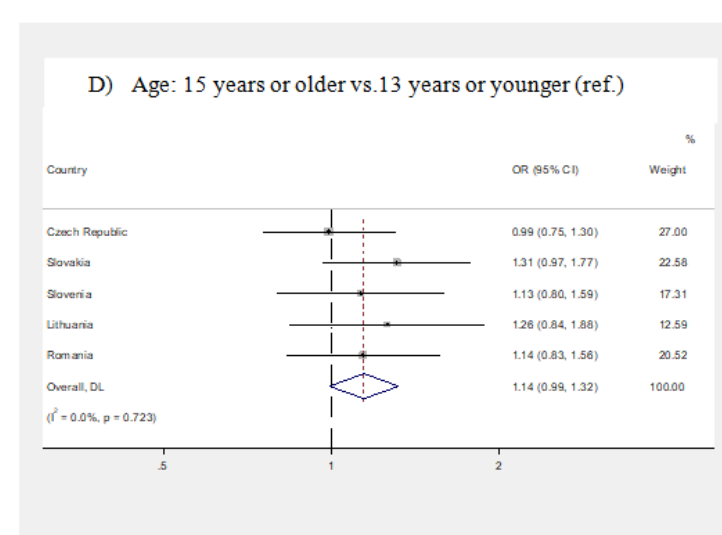

Fig. S1. Forest plots showing adjusted associations of selected sociodemographic factors and susceptibility to tobacco use among never smoking youth from five central and eastern European countries. Country-specific odds ratio (OR) and 95% confidence interval (CI) were estimated by multivariable logistic regression models, and overall OR and 95% CI were estimated by random-effects meta-analysis by country. The following factors were included in the model: sex, age, money available for own expenses, SHS exposure at home and in public places, parental and peers smoking, knowledge about harmfulness of active and passive smoking, difficulty of quitting smoking, attractiveness and popularity of smoking, antismoking education provided by the school or family, tobacco advertising at point of sale, noticing people smoking at school and in movies.  $I^2$ , percentage of the total variability attributable to between-country heterogeneity; p, p value of heterogeneity using the Cochran's Q test.

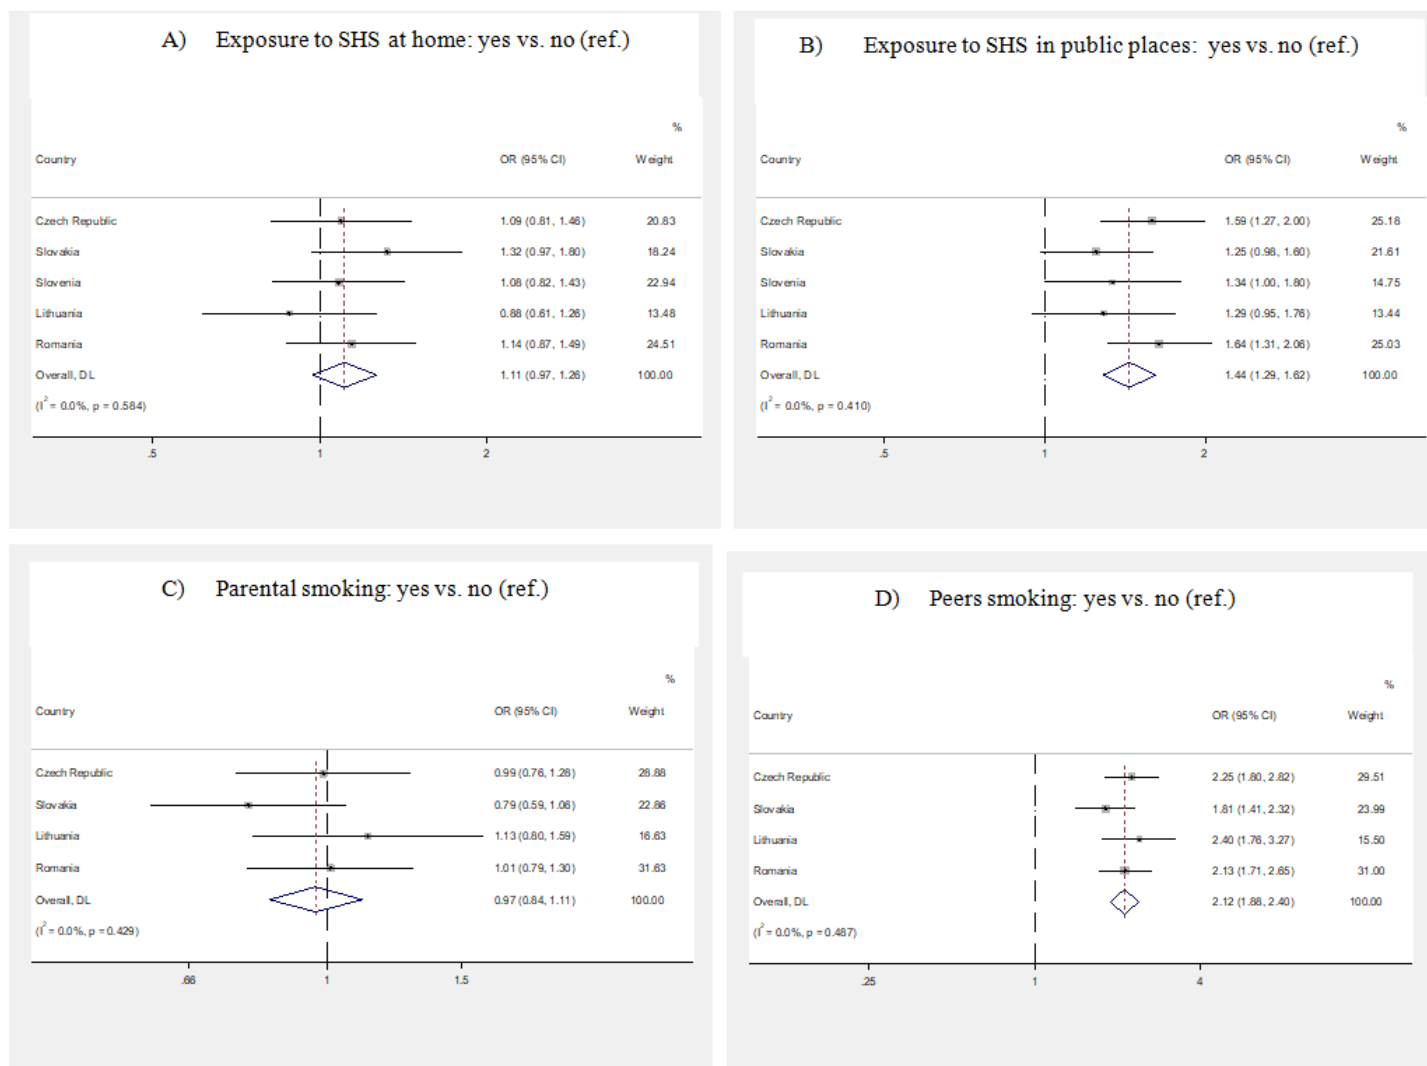

Fig. S2. Forest plots showing adjusted associations of selected factors related to SHS exposure and susceptibility to tobacco use among never smoking youth from five central and eastern European countries. Country-specific odds ratio (OR) and 95% confidence interval (CI) were estimated by multivariable logistic regression models, and overall OR and 95% CI were estimated by random-effects meta-analysis by country. The following factors were included in the model: sex, age, money available for own expenses, SHS exposure at home and in public places, parental and peers smoking, knowledge about harmfulness of active and passive smoking, difficulty of quitting smoking, attractiveness and popularity of smoking, antismoking education provided by the school or family, pro-tobacco media and advertising. I<sup>2</sup>, percentage of the total variability attributable to between-country heterogeneity; p, p value of heterogeneity using the Cochran's Q test.

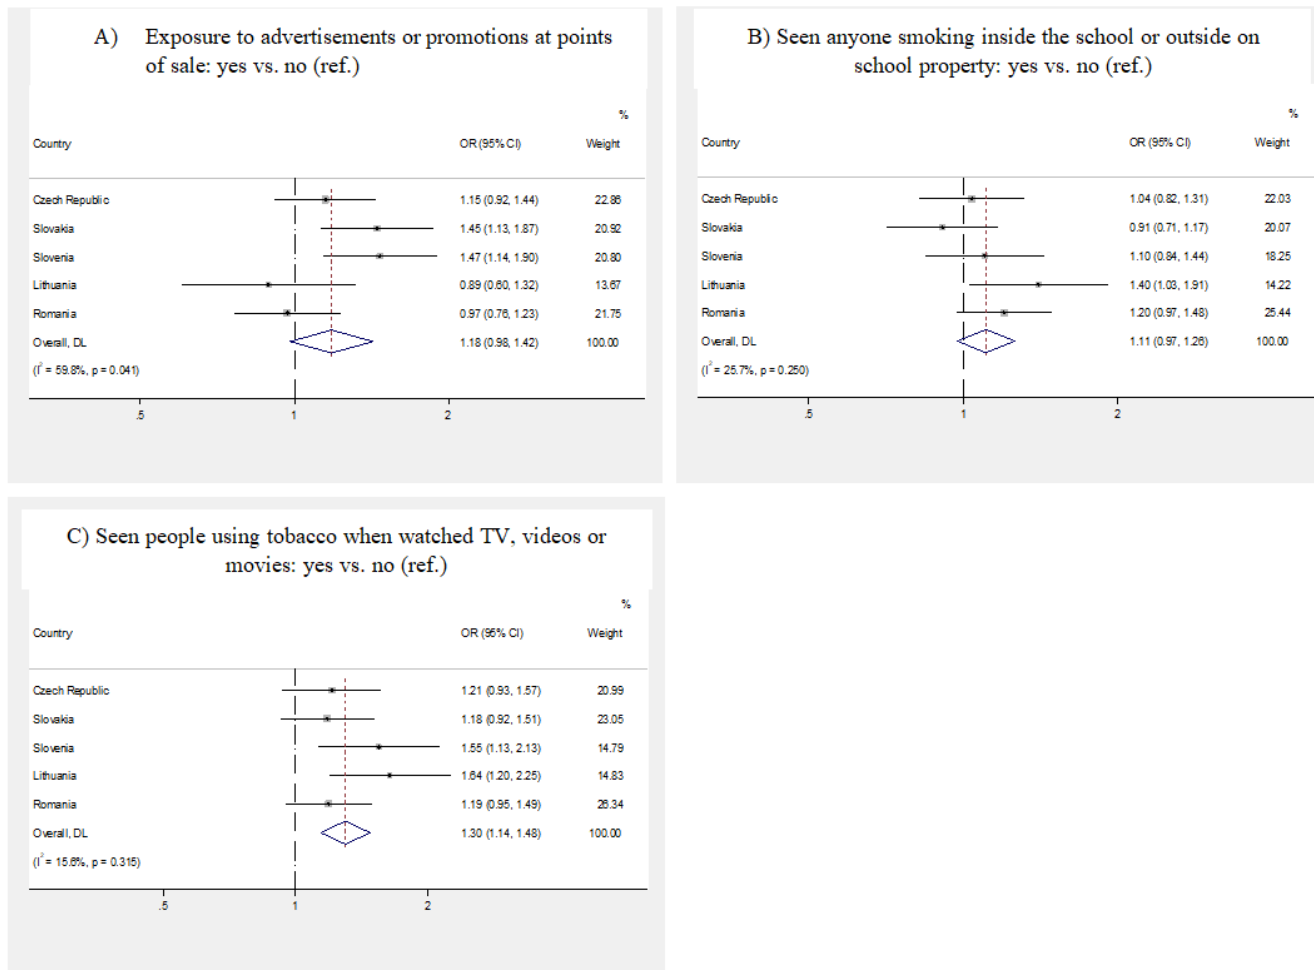

Fig. S3. Forest plots showing adjusted associations of noticing tobacco advertising at point of sale, people smoking at school and in movies and susceptibility to tobacco use among never smoking youth from five central and eastern European countries. Country-specific odds ratio (OR) and 95% confidence interval (CI) were estimated by multivariable logistic regression models, and overall OR and 95% CI were estimated by random-effects meta-analysis by country. The following factors were included in the model: sex, age, money available for own expenses, SHS exposure at home and in public places, parental and peers smoking, knowledge about harmfulness of active and passive smoking, difficulty of quitting smoking, attractiveness and popularity of smoking, antismoking education provided by the school or family, pro-tobacco media and advertising.  $I^2$ , percentage of the total variability attributable to between-country heterogeneity;  $p$ ,  $p$  value of heterogeneity using the Cochran's Q test.



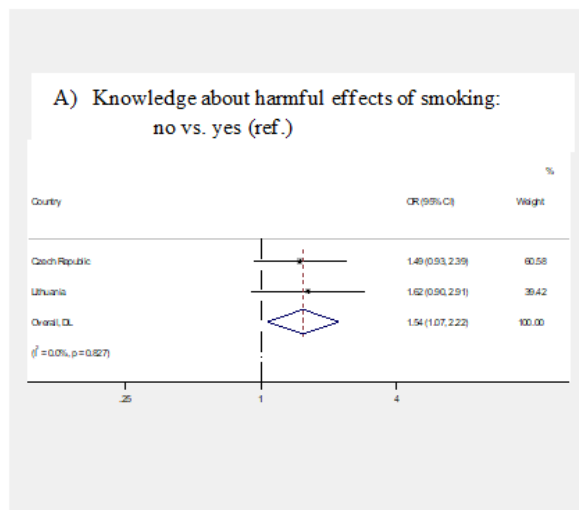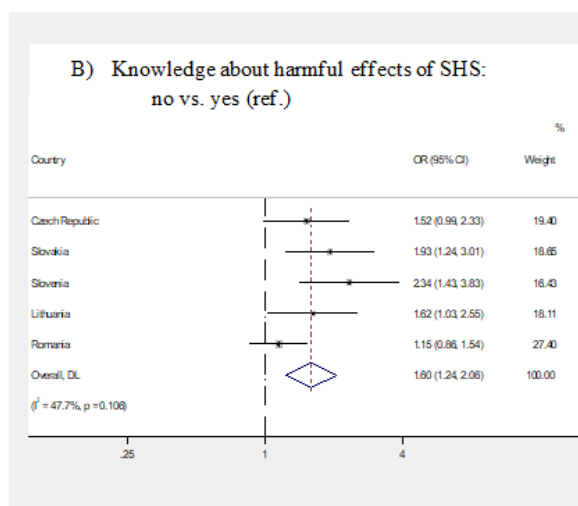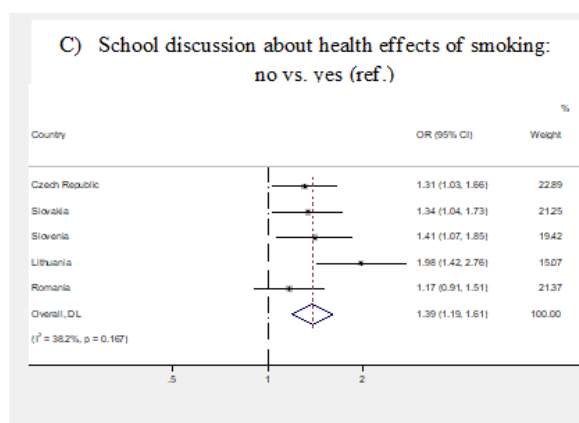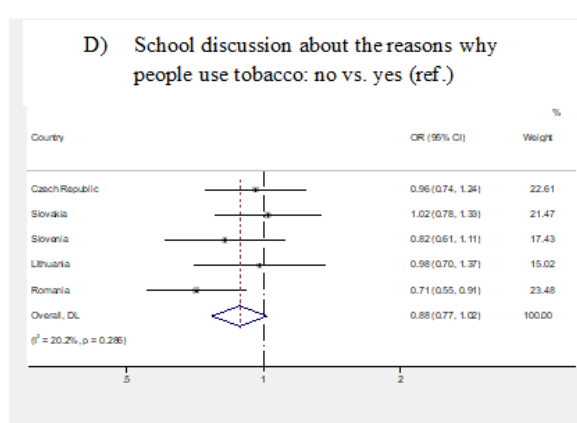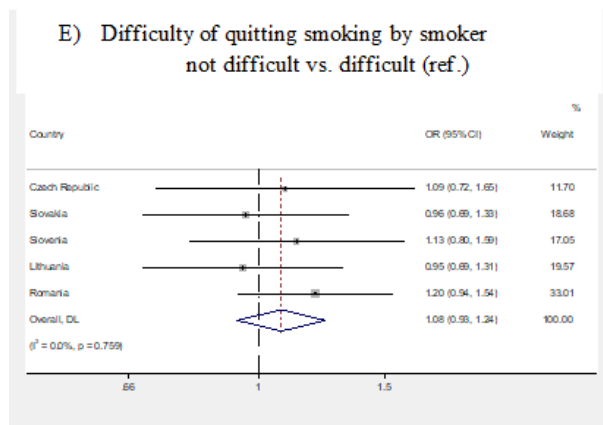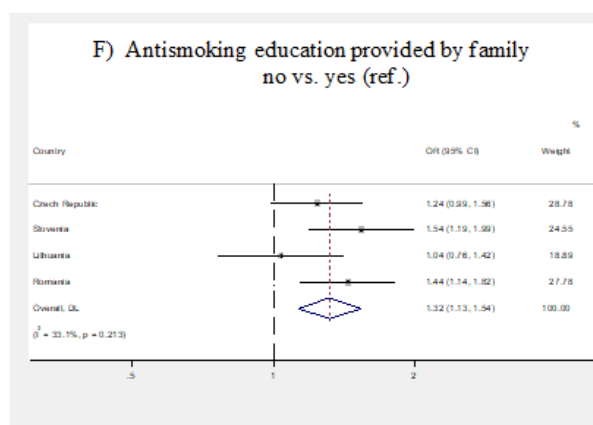

Fig. S4. Forest plots showing adjusted associations of knowledge about harmfulness of active and passive smoking, difficulty of quitting smoking, and susceptibility to tobacco use among never smoking youth from five central and eastern European countries. Country-specific odds ratio (OR) and 95% confidence interval (CI) were estimated by multivariable logistic regression models, and overall OR and 95% CI were estimated by random-effects meta-analysis by country. The following factors were included in the model: sex, age, money available for own expenses, SHS exposure at home and in public places, parental and peers smoking, knowledge about harmfulness of active and passive smoking, difficulty of quitting smoking, attractiveness and popularity of smoking, antismoking education provided by the school or family, tobacco advertising at point of sale, noticing people smoking at school and in movies.  $I^2$ , percentage of the total variability attributable to between-country heterogeneity;  $p$ ,  $p$  value of heterogeneity using the Cochran's Q test.

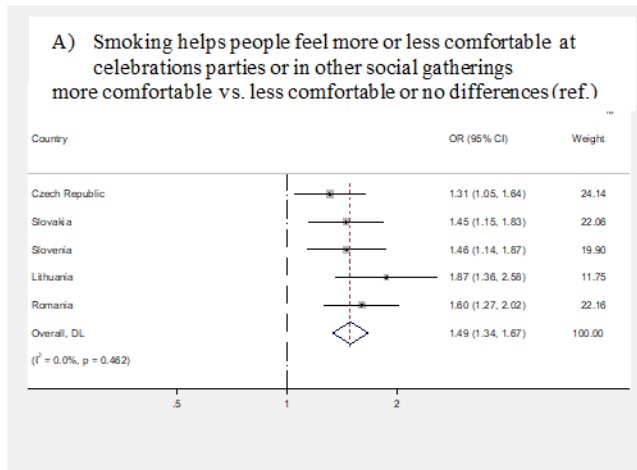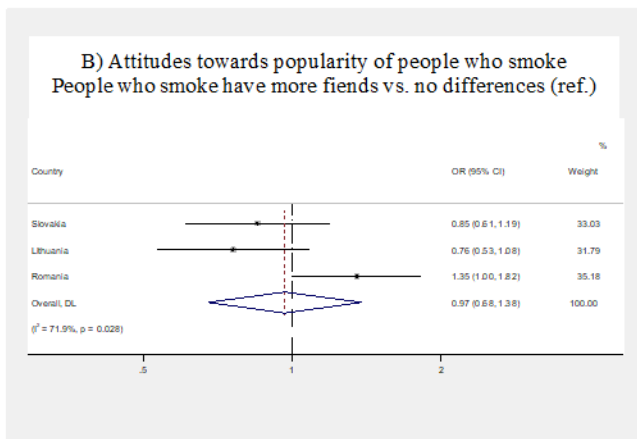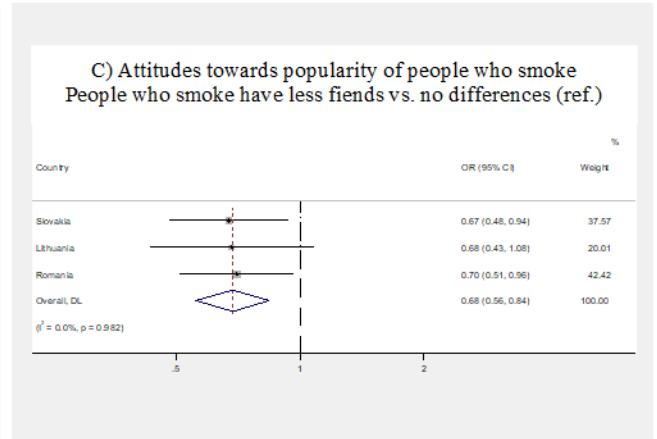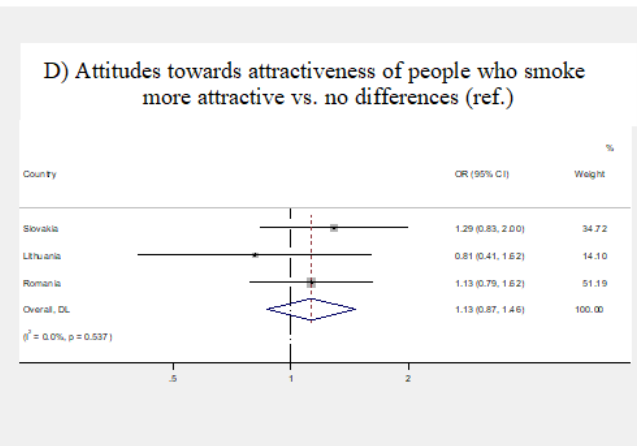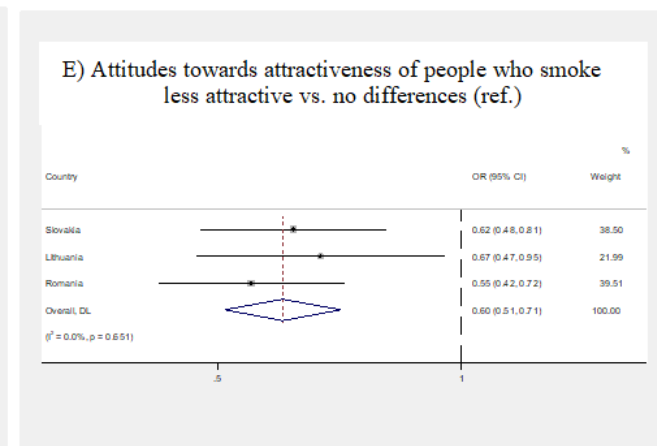

Fig. S5. Forest plots showing adjusted associations of attractiveness and popularity of smoking and susceptibility to tobacco use among never smoking youth from five central and eastern European countries. Country-specific odds ratio (OR) and 95% confidence interval (CI) were estimated by multivariable logistic regression models, and overall OR and 95% CI were estimated by random-effects meta-analysis by country. The following factors were included in the model: sex, age, money available for own expenses, SHS exposure at home and in public places, parental and peers smoking, knowledge about harmfulness of active and passive smoking, difficulty of quitting smoking, attractiveness and popularity of smoking, antismoking education provided by the school or family, tobacco advertising at point of sale, noticing people smoking at school and in movies.  $I^2$ , percentage of the total variability attributable to between-country heterogeneity; p, p value of heterogeneity using the Cochran's Q test.
